# Supplementary material for: Dietary astaxanthin-rich extract ameliorates atherosclerosis/retinopathy and restructures gut microbiome in apolipoprotein E-deficient mice fed on a high-fat diet
Source: Royal Society of Chemistry journal article supplement (doi:10.1039/d2fo02102a), 2022-01-01
Supplement: d2fo02102a1.pdf [file d2fo02102a1.pdf]

**Supplemental Table 1 Ingredient and composition of diets in different experimental groups.**

| Group                                     | WT & ApoE <sup>-/-</sup> |       | ApoE <sup>-/-</sup> |       |       |
|-------------------------------------------|--------------------------|-------|---------------------|-------|-------|
|                                           | LFD                      | HFD   | ASTL                | ASTH  | ATO   |
| <b>Ingredients (g/Kg)</b>                 |                          |       |                     |       |       |
| Casein                                    | 212                      | 212   | 212                 | 212   | 212   |
| Sucrose                                   | 50                       | 50    | 50                  | 50    | 50    |
| D–L Methionine                            | 1                        | 1     | 1                   | 1     | 1     |
| Vitamin mix (AIN-93)                      | 15                       | 15    | 15                  | 15    | 15    |
| Mineral mix (AIN-93)                      | 35                       | 35    | 35                  | 35    | 35    |
| Lard                                      | 50                       | 200   | 200                 | 200   | 200   |
| Cholesterol                               | -                        | 1     | 1                   | 1     | 1     |
| Gelatin                                   | 10                       | 10    | 10                  | 10    | 10    |
| Corn starch                               | 627                      | 476   | 476                 | 476   | 476   |
| Olive oil                                 | 0.329                    | 0.329 | 0.165               | -     | 0.329 |
| Astaxanthin oil                           | -                        | -     | 0.164               | 0.329 | -     |
| Atorvastatin                              | -                        | -     | -                   | -     | 0.065 |
| <b>Nutrients (g/Kg)</b>                   |                          |       |                     |       |       |
| <b>Protein</b>                            | <b>200</b>               |       | <b>200</b>          |       |       |
| <i>Total energy from Protein (%)</i>      | 20                       |       | 17                  |       |       |
| <b>Fat</b>                                | <b>50</b>                |       | <b>200</b>          |       |       |
| <i>Total energy from fat (%)</i>          | 11                       |       | 38                  |       |       |
| <b>Carbohydrate</b>                       | <b>696</b>               |       | <b>545</b>          |       |       |
| <i>Total energy from carbohydrate (%)</i> | 69                       |       | 46                  |       |       |
| <b>Total energy(kJ/kg)</b>                | <b>16877</b>             |       | <b>19998</b>        |       |       |

**Supplemental Table 2 The primer sequences used for real-time PCR analysis**

| Target Gene   | Forward primer (5'-3')  | Reverse primer (5'-3')    |
|---------------|-------------------------|---------------------------|
| GAPDH         | GCATCTTCTTGTGCAGTGCC    | TACGGCCAAATCCGTTTACA      |
| ApoE          | ACCGCTTCTGGGATTACC      | CAGTGCCGTCAGTTCTTG        |
| AMPK $\alpha$ | GGACTTACTTGTGGATTCCG    | CCTTTGGCAAGATCGATAGTTG    |
| HMGCOA-R      | GCCGTCATTCCAGCCAAG      | CGTTGTAGCCGCCTATGC        |
| LXR $\alpha$  | GAAGCGGCAAGAAGAGGAACAG  | GGCAGGACTTGAGGAGGTGAG     |
| FXR           | CAGTTGCCGTGAGGAAGCTA    | CACTGGATTTCAGTTAACAAACCTG |
| CYP7A1        | CCTCTGAAGAAGTGAATGG     | AGTGAAGTCCTCCTTAGC        |
| NPC1L1        | ACAGGAACAAGAACAAGAC     | ACAAGGCTATCACAACATATG     |
| ABCG5         | CCTGCTGAGGCGAGTAACAA    | TGGCACCCACAAGCTGATAG      |
| ABCG8         | CCTCTCAGGTGCCTTGTTT     | GTCAGTGTCTGTGTGAGGG       |
| ACAT2         | CATTGAGATCTGGGGCCTCG    | CATCAGGTTGTGAGGGGGAC      |
| MTTP          | GCCACATCTGTCACTACCTAC   | CACCTGCCACTTGCTTCC        |
| Mucin2        | GGAACTTCAGAAAGAAGCCAGAT | CGGACTCTATGCTGGAGTGA      |
| JAM-A         | AGTTCGTCCAAGGCAGCACAAAC | AGAAGGTGACTCGGTCCGCATAG   |
| Occludin      | ATTCCATCAGTTTCCTATC     | ACCAGGACCTTTCTTGAC        |
